# Supplementary material for: Population and distribution of wild Asian elephants (Elephas maximus) in Phu Khieo Wildlife Sanctuary, Thailand
Source: PeerJ. 2021 Jul 29;9:e11896. doi: 10.7717/peerj.11896 (PMC8325913; doi:10.7717/peerj.11896)
Supplement: Supplemental Information 2 [file peerj-09-11896-s002.xlsx]

## Sheet: Sheet1
Environmental Factor	Present
	Number
Total Camera Tarp Station	149
Relative Frequency (RF)	49
Forest
Dry Evergreen Forest	41
Mixed Deciduous Forest	7
Pine Forest	0
Dry Dipterocarp Forest	1
Secondary Forest	0
Total	49
Elevation (m)
200-400	2
400-700	5
700-900	29
900-1,100	7
1,100-1,300	6
Total	49
Slope (%)
0 - 20	27
20 - 40	10
40 - 60	8
60 - 80	4
Total	49
Trap-night	6896
Encounter rate	4319
