# Supplementary material for: Population and distribution of wild Asian elephants (Elephas maximus) in Phu Khieo Wildlife Sanctuary, Thailand
Source: PeerJ. 2021 Jul 29;9:e11896. doi: 10.7717/peerj.11896 (PMC8325913; doi:10.7717/peerj.11896)
Supplement: Supplemental Information 3 [file peerj-09-11896-s003.xlsx]

## Sheet: Sheet1
		Elephnat Herd Population and Sex Structure in Phu Khieo Wildlife Sanctuary															Sex ratio And Reproductive ratio in Phu Khieo Wildlife Sanctuary
		Adult				Sub_Adult				Juvnile		Calf		Total			Sex ratio						Reproductive Ratio
		Male	%	Female	%	Male	%	Female	%		%		%		%		AM	AF	SM	SF	JU	CL	AF	JU	CA
	Herd_001	2	16.6667	6	50	0	0	2	16.6667	2	16.6667	0	0	12	100		1	3	0	0.333333	0.333333	0	1	0.33	0
	Herd_002	3	13.6364	10	45.4545	5	22.7273	2	9.09091	2	9.09091	0	0	22	100		1	3.33333	0.5	0.2	0.2	0	1	0.2	0
	Herd_003	6	24	10	40	3	12	2	8	2	8	2	8	25	100		1	1.66667	0.3	0.2	0.2	0.2	1	0.2	0.2
	Herd_004	2	15.3846	5	38.4615	2	15.3846	1	7.69231	3	23.0769	0	0	13	100		1	2.5	0.4	0.2	0.6	0	1	0.6	0
	Herd_005	4	33.3333	6	50	0	0	1	8.33333	0	0	1	8.33333	12	100		1	1.5	0	0.166667	0	0.166667	1	0	0.17
	Herd_006	3	21.4286	4	28.5714	4	28.5714	1	7.14286	0	0	2	14.2857	14	100		1	1.33333	1	0.25	0	0.5	1	0	0.5
	Herd_007	2	25	2	25	0	0	0	0	2	25	2	25	8	100		1	1	0	0	1	1	1	1	1
	Herd of Male	2												2
	Solitary Male	6												6
	Total	30	26	43	37	14	12	9	9	11	10	7	6	114	100
