# Supplementary material for: Population and distribution of wild Asian elephants (Elephas maximus) in Phu Khieo Wildlife Sanctuary, Thailand
Source: PeerJ. 2021 Jul 29;9:e11896. doi: 10.7717/peerj.11896 (PMC8325913; doi:10.7717/peerj.11896)
Supplement: Supplemental Information 5 [file peerj-09-11896-s005.xlsx]

## Sheet: maxentResults
Species	#Training samples	Regularized training gain	Unregularized training gain	Iterations	Training AUC	#Test samples	Test gain	Test AUC	AUC Standard Deviation	#Background points	LC contribution	elevation contribution	forest contribution	saltlick contribution	slope contribution	LC permutation importance	elevation permutation importance	forest permutation importance	saltlick permutation importance	slope permutation importance	Training gain without LC	Training gain without elevation	Training gain without forest	Training gain without saltlick	Training gain without slope	Training gain with only LC	Training gain with only elevation	Training gain with only forest	Training gain with only saltlick	Training gain with only slope	Test gain without LC	Test gain without elevation	Test gain without forest	Test gain without saltlick	Test gain without slope	Test gain with only LC	Test gain with only elevation	Test gain with only forest	Test gain with only saltlick	Test gain with only slope	AUC without LC	AUC without elevation	AUC without forest	AUC without saltlick	AUC without slope	AUC with only LC	AUC with only elevation	AUC with only forest	AUC with only saltlick
Elephant_0	45	0.139	0.2323	300	0.6933	4	-0.1396	0.4943	0.1037	10044	2.6898	60.4014	20.8185	16.0903	0	4.5725	62.0839	8.0407	25.3029	0	0.1315	0.0885	0.1144	0.1172	0.139	0.0072	0.0894	0.0518	0.0318	0.0021	-0.2556	0.0058	-0.1541	-0.125	-0.1398	0.0295	-0.1711	-0.1108	-0.054	-0.0198	0.3971	0.5784	0.4595	0.4746	0.4938	0.6075	0.4295	0.3767	0.4528
Elephant_1	45	0.196	0.3535	340	0.7306	4	-1.2106	0.3931	0.1739	10044	15.2394	47.4924	16.9736	20.2337	0.0609	22.0137	35.368	8.6099	33.4577	0.5507	0.1605	0.1473	0.1665	0.1524	0.196	0.0233	0.0981	0.04	0.0564	0	-1.0229	-0.9233	-1.1578	-0.7233	-1.2064	-0.2148	-0.4268	0.0256	-0.5685	0	0.4264	0.3839	0.3769	0.4101	0.3959	0.271	0.5238	0.579	0.415
Elephant_2	45	0.1476	0.2674	220	0.7036	4	-0.2774	0.4101	0.117	10045	15.25	52.0851	28.3437	4.3146	0.0067	21.6626	53.169	14.5566	10.6085	0.0033	0.1162	0.1024	0.111	0.1399	0.1478	0.0224	0.0861	0.0531	0.0097	0.0006	-0.1314	-0.1972	-0.1389	-0.3764	-0.2734	-0.1283	-0.1348	-0.134	0.1546	0.0008	0.4833	0.4225	0.4365	0.3655	0.4123	0.3898	0.44	0.4292	0.8232
Elephant_3	45	0.1021	0.179	220	0.6702	4	0.2272	0.7313	0.0607	10044	5.4771	65.7775	11.8713	16.5283	0.3458	13.4357	62.4798	0	24.0845	0	0.0932	0.0597	0.0946	0.0853	0.1018	0.005	0.0723	0.0248	0.0238	0.0029	0.1018	0.2925	0.1026	0.1833	0.2403	0.0719	0.0343	0.1425	0.0357	-0.0339	0.6248	0.7795	0.6093	0.7022	0.7444	0.7539	0.5572	0.655	0.5676
Elephant_4	46	0.0963	0.1812	300	0.6747	3	0.414	0.8194	0.1038	10045	3.9101	57.6691	27.6142	10.7088	0.0978	15.021	22.1912	22.7971	38.4737	1.5169	0.0902	0.0644	0.0754	0.0861	0.0962	0.0052	0.0619	0.0391	0.0181	0.003	0.2632	0.3299	0.3507	0.2785	0.422	0.0707	0.1823	0.0414	0.125	-0.0495	0.7453	0.8467	0.8063	0.7822	0.8218	0.713	0.734	0.5455	0.6886
Elephant_5	46	0.1115	0.1963	280	0.6807	3	0.1313	0.667	0.0257	10045	12.0822	51.4747	19.7048	16.6639	0.0743	24.5975	7.5771	22.2836	43.0962	2.4455	0.0927	0.0839	0.0906	0.0904	0.1113	0.0169	0.0585	0.0381	0.0251	0.0021	0.1411	-0.0121	0.1272	0.1481	0.1422	-0.0925	0.2275	-0.0173	0.015	-0.0283	0.67	0.4947	0.6586	0.6455	0.6802	0.3333	0.7729	0.5438	0.5697
Elephant_6	46	0.1239	0.2424	300	0.6968	3	0.0469	0.59	0.0475	10045	10.5949	45.4621	27.6977	16.2453	0	24.4688	5.7501	29.9972	39.7839	0	0.1044	0.0912	0.0947	0.1026	0.1239	0.0103	0.0644	0.0413	0.0282	0.001	0.0582	-0.0359	0.1167	0.0575	0.0459	0.0338	0.1314	0.0083	-0.0242	-0.0044	0.6072	0.5468	0.6343	0.5711	0.5888	0.5368	0.5827	0.5362	0.4894
Elephant_7	46	0.1236	0.2157	320	0.6863	3	0.0068	0.5656	0.1291	10045	11.5888	59.1201	25.1052	4.1859	0	27.4705	15.7065	37.0649	19.7581	0	0.103	0.0847	0.0953	0.1159	0.1236	0.018	0.0777	0.0467	0.0104	0.0001	0.0269	0.0244	0.0506	-0.1302	0.0059	-0.0955	-0.0558	-0.0765	0.1988	0.0054	0.6423	0.5485	0.5883	0.437	0.565	0.4347	0.5453	0.4379	0.8781
Elephant_8	46	0.117	0.2345	280	0.6898	3	0.1106	0.6291	0.1315	10045	11.0346	55.3581	24.68	8.9273	0	23.5612	22.4683	19.8314	34.1391	0	0.1	0.0728	0.0921	0.1079	0.117	0.0104	0.0721	0.0352	0.0145	0	0.0552	0.2145	0.1042	-0.0072	0.1104	0.0181	0.0198	0.0887	0.1256	0.0039	0.6062	0.7176	0.6084	0.5396	0.6287	0.5403	0.5324	0.6697	0.6474
Elephant_9	46	0.1248	0.2477	320	0.6942	3	0.0481	0.59	0.1089	10045	8.8593	49.9596	24.5212	16.6222	0.0378	21.4271	15.0888	12.0814	50.3774	1.0253	0.1096	0.0827	0.1003	0.1041	0.1247	0.0058	0.0702	0.0382	0.0282	0.0017	-0.0261	0.11	0.0236	0.0492	0.0501	0.0859	0.0491	0.0512	-0.0242	-0.0205	0.5347	0.656	0.5571	0.596	0.5941	0.7298	0.5852	0.5764	0.4894
Elephant_10	46	0.108	0.1994	340	0.6782	3	0.3021	0.814	0.0332	10045	8.5226	47.172	27.1291	17.1385	0.0377	20.8713	7.786	25.6235	44.6945	1.0247	0.0938	0.0789	0.0855	0.0883	0.108	0.0089	0.0589	0.0376	0.0257	0.0018	0.2225	0.1691	0.2574	0.2897	0.3051	0.0532	0.2229	0.0653	0.0149	-0.0208	0.7579	0.6784	0.7806	0.7663	0.8162	0.6797	0.7344	0.5634	0.5128
Elephant_11	46	0.1273	0.234	280	0.6946	3	-0.0329	0.5194	0.062	10045	4.6351	48.5449	28.1893	18.4416	0.1891	16.6633	18.9987	20.9364	42.4049	0.9968	0.1177	0.0915	0.0982	0.1047	0.127	0.0056	0.0718	0.0502	0.0318	0.0002	-0.1762	-0.0798	0.0296	0.0259	-0.01	0.0687	0.025	-0.1342	-0.0925	0.0058	0.4051	0.5091	0.5669	0.5256	0.5384	0.7054	0.525	0.3891	0.4354
Elephant_12	46	0.103	0.1878	260	0.6767	3	0.2334	0.7599	0.0937	10045	13.1129	44.4405	32.521	9.9256	0	26.2252	0	36.4909	36.5508	0.7331	0.0821	0.0848	0.0712	0.0924	0.103	0.0132	0.0496	0.0425	0.0158	0.0012	0.2882	0.0533	0.3531	0.1032	0.2387	-0.0262	0.2759	-0.0086	0.1535	-0.0086	0.8016	0.6546	0.8916	0.6872	0.7619	0.4908	0.9493	0.5784	0.7242
Elephant_13	46	0.1262	0.2188	280	0.6924	3	-0.046	0.5425	0.1539	10045	10.9219	38.506	23.6324	26.9348	0.0049	23.1887	3.7722	23.397	49.133	0.5091	0.105	0.1025	0.1018	0.093	0.1262	0.014	0.0586	0.0434	0.0394	0.0021	0.0013	-0.2413	-0.0553	0.1818	-0.0436	-0.0395	0.2181	-0.0239	-0.2243	-0.0285	0.5812	0.3554	0.5087	0.6999	0.5446	0.3813	0.7275	0.5227	0.3016
Elephant_14	46	0.1104	0.179	260	0.6791	3	0.0767	0.6187	0.1431	10045	13.1619	55.9768	9.3243	20.8925	0.6444	18.5322	20.4844	6.9164	54.067	0	0.0941	0.0727	0.103	0.0865	0.1096	0.0119	0.0696	0.0206	0.0269	0.0002	0.0198	0.0962	-0.0591	0.1534	0.1333	-0.0065	0.0583	0.2307	-0.0011	-0.0279	0.5555	0.6586	0.4971	0.6457	0.6519	0.5029	0.5778	0.8493	0.5028
Elephant (average)	45.7333	0.1238	0.2246	286.667	0.6894	3.2667	-0.0073	0.6096	0.0992	10044.8	9.8054	51.9627	23.2084	14.9236	0.1	20.2474	23.5283	19.2418	36.3955	0.587	0.1063	0.0872	0.0996	0.1044	0.1237	0.0119	0.0706	0.0402	0.0257	0.0013	-0.0289	-0.0129	-0.0033	0.0072	0.0014	-0.0114	0.0437	0.0099	-0.011	-0.0151	0.5892	0.5887	0.5987	0.5899	0.6159	0.538	0.6145	0.5502	0.5665
[truncated: 69 more columns]
